# Supplementary material for: Facile Synthesis of Water-Soluble Fullerene (C60) Nanoparticles via Mussel-Inspired Chemistry as Efficient Antioxidants
Source: MDPI journal article supplement (doi:10.3390/nano9121647), 2019-11-20
Supplement: s1 [file s1]

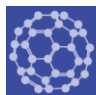

# Facile Synthesis of Water-Soluble Fullerene (C<sub>60</sub>) Nanoparticles via Mussel-Inspired Chemistry as Efficient Antioxidants

Xiaoyan Zhang <sup>†</sup>, Yihan Ma <sup>\*,†</sup>, Sheng Fu and Aiqing Zhang <sup>\*</sup>

College of Chemistry and Materials Science, South-Central University for Nationalities, Wuhan 430074, China; zxy517317@163.com (X.Z.); fusheng4715@163.com (S.F.)

<sup>\*</sup> Correspondence: mayihan@iccas.ac.cn (Y.M.); 074707@mail.scuec.edu.cn (A.Z.)

<sup>†</sup> These authors contributed equally to this work

## Supporting Information

### The characterization section:

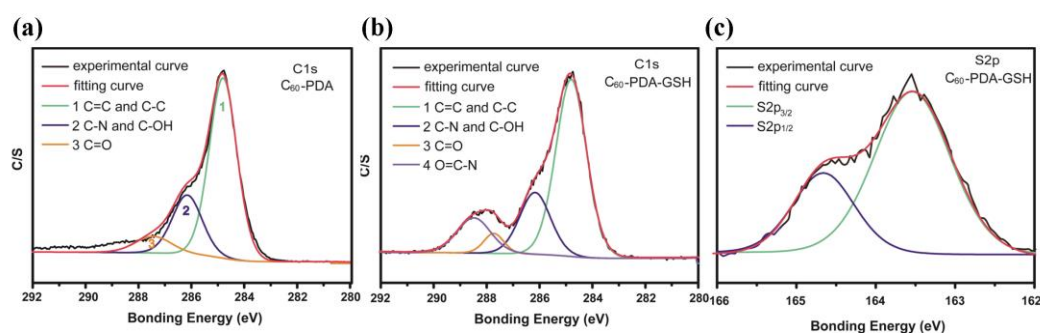

**Figure S1.** XPS C1s spectra and fitted curves of (a) C<sub>60</sub>-PDA and (b) C<sub>60</sub>-PDA-PEI nanoparticles; (c) S2p spectrum and fitted curve of C<sub>60</sub>-PDA-PEI nanoparticles

Dynamic Light Scattering (DLS) and zeta-potential measurements were performed on a Zetasizer Nano ZSP instrument. The samples were filtered through a membrane with 220 nm pore size before DLS measurement. The zeta potentials were measured three times per sample in Milli-Q water at pH 7.0.



|                              | Mean (mV)     | Area (%) | St Dev (mV) |
|------------------------------|---------------|----------|-------------|
| Zeta Potential (mV): -24.5   | Peak 1: -20.9 | 99.8     | 7.00        |
| Zeta Deviation (mV): 24.1    | Peak 2: 110   | 0.2      | 0.00        |
| Conductivity (mS/cm): 0.0234 | Peak 3: 0.00  | 0.0      | 0.00        |

Result quality : Good

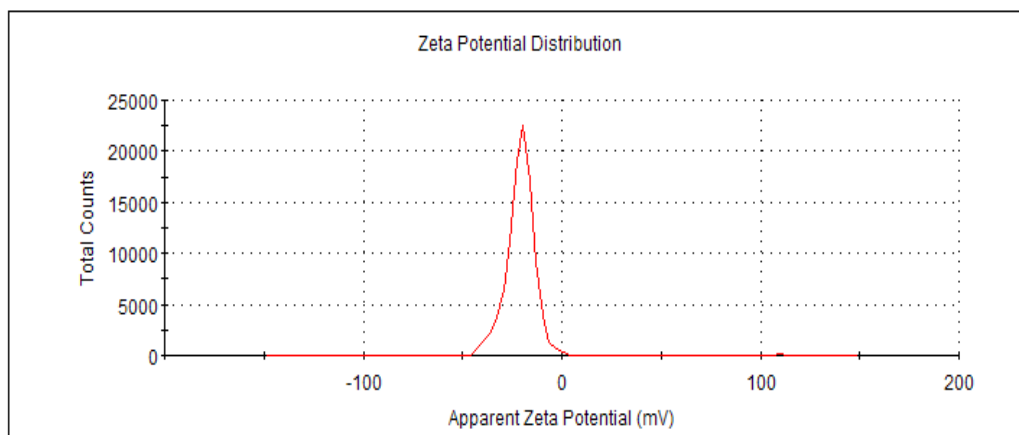

Figure S2. Zeta potential of C<sub>60</sub>-PDA-GSH nanoparticles measured by DLS
